# Supplementary material
Source: publisher site journal article supplement (http://kjim.org/upload/media/kjim-2017-194-suppl4.pdf)
Supplement: Supplementary file 1 [file kjim-2017-194-suppl4.pdf]

|                | Random sequence generation (selection bias) | Allocation concealment (selection bias) | Blinding of participants and personnel (performance bias) | Blinding of outcome assessment (detection bias) | Incomplete outcome data (attrition bias) | Selective reporting (reporting bias) | Other bias |
|----------------|---------------------------------------------|-----------------------------------------|-----------------------------------------------------------|-------------------------------------------------|------------------------------------------|--------------------------------------|------------|
| Loomba 2015    | +                                           | +                                       | +                                                         | +                                               | +                                        | +                                    | +          |
| Nelson 2009    |                                             |                                         | +                                                         | +                                               | -                                        | -                                    | +          |
| Takeshita 2014 | +                                           | +                                       | +                                                         | +                                               | +                                        | +                                    | +          |

**Supplementary Figure 1.** Risk of bias summary: review authors' judgments about each risk of bias item for each included study.
